# Supplementary material for: Oxidant-induced cell-cycle delay in Saccharomyces cerevisiae: the involvement of the SWI6 transcription factor
Source: Oxford University Press journal article supplement (doi:10.1111/j.1567-1364.2007.00349.x), 2008-01-16
Supplement: FYR_349_sm_TableS1-2.doc [file FYR_349_sm_TableS1-2.doc]

**Supplementary material**

**Table S1a. The complete set of deletants that exhibit the altered cell cycle response phenotype after LoaOOH treatment.**

| GENE | Gene Description | |
| --- | --- | --- |
| *GO Cellular Component* | *GO Biological Process* | *GO Molecular Function* |
| *YGR064W* | Hypothetical ORF | |
| *-* | *-* | *-* |
| *YOR135C* | Hypothetical ORF | |
| *-* | *-* | *-* |
| *TAT1* | Amino acid transport protein for valine, leucine, isoleucine, and tyrosine | |
| *plasma membrane* | *amino acid transport* | *amino acid transporter activity* |
| *YBR285W* | Hypothetical ORF | |
| *cc unknown* | *bp unknown* | *mf unknown* |
| *YCR061W* | Protein of unknown function; green fluorescent protein (GFP)-fusion protein localizes to the cytoplasm in a punctate pattern | |
| *cytoplasm* | *bp unknown* | *mf unknown* |
| *YCR095C* | Cytoplasmic protein required for replication of Brome mosaic virus in S. cerevisiae, which is a model system for studying replication of positive-strand RNA viruses in their natural hosts | |
| *cytoplasm* | *bp unknown* | *mf unknown* |
| *YDL173W* | Hypothetical ORF | |
| *cytoplasm* | *bp unknown* | *mf unknown* |
| *GTR2* | Cytoplasmic GTP binding protein, functions as a negative regulator of the Ran/Tc4 GTPase cycle downstream of its binding partner and homolog Gtr1p; homolog of human RagC and RagD proteins | |
| *cytoplasm* | *bp unknown* | *GTPase activity* |
| *YIL077C* | Hypothetical ORF | |
| *mitochondrion* | *bp unknown* | *mf unknown* |
| *YLR456W* | Hypothetical ORF | |
| *cc unknown* | *bp unknown* | *mf unknown* |
| *YNL080C* | Deletion causes slight growth defect, similar to U. maydis myp1 protein | |
| *membrane* | *bp unknown* | *mf unknown* |
| *SNF5* | Involved in global regulation of transcription; subunit of the chromatin remodeling Snf/Swi complex | |
| *nucleosome remodeling complex* | *chromatin remodeling* | *general RNA polymerase II transcription factor activity* |
| *SNF6* | Involved in global regulation of transcription; subunit of the chromatin remodeling Snf/Swi complex | |
| *nucleosome remodeling complex* | *chromatin remodeling* | *general RNA polymerase II transcription factor activity* |
| *SWI3* | transcription factor | |
| *nucleosome remodeling complex* | *chromatin remodeling* | *general RNA polymerase II transcription factor activity* |
| *COX15* | Protein required for the hydroxylation of heme O to form heme A, which is an essential prosthetic group for cytochrome c oxidase | |
| *mitochondrial inner membrane* | *cytochrome c oxidase biogenesis* | *mf unknown* |
| *ASF1* | anti-silencing protein that causes depression of silent loci when overexpressed; involved in silencing | |
| *chromatin assembly complex* | *DNA damage response, signal transduction resulting in induction of apoptosis* | *histone binding* |
| *MMS22* | Protein involved in resistance to ionizing radiation; acts with Mms1p in a repair pathway that may be involved in resolving replication intermediates or preventing the damage caused by blocked replication forks | |
| *cc unknown* | *double-strand break repair* | *mf unknown* |
| *THR4* | threonine synthase | |
| *cytoplasm* | *endocytosis* | *threonine synthase activity* |
| *PDX3* | Pyridoxine (pyridoxamine) phosphate oxidase, has homologs in E. coli and Myxococcus xanthus; transcription is under the general control of nitrogen metabolism | |
| *cc unknown* | *fatty acid metabolism* | *pyridoxamine-phosphate oxidase activity* |
| *PFK26* | 6-phosphofructo-2-kinase, inhibited by phosphoenolpyruvate and sn-glycerol 3-phosphate, has negligible fructose-2,6-bisphosphatase activity, transcriptional regulation involves protein kinase A | |
| *cytoplasm* | *fructose 2,6-bisphosphate metabolism* | *6-phosphofructo-2-kinase activity* |
| *PEP3* | Vacuolar peripheral membrane protein that promotes vesicular docking/fusion reactions in conjunction with SNARE proteins, required for vacuolar biogenesis, forms complex with Pep5p that mediates protein transport to the vacuole | |
| *vacuolar membrane (sensu Fungi)* | *late endosome to vacuole transport* | *protein binding* |
| *IWR1* | Protein of unknown function, deletion causes hypersensitivity to the K1 killer toxin | |
| *cytoplasm* | *meiosis* | *mf unknown* |
| *SWI6* | Transcription cofactor, forms complexes with DNA-binding proteins Swi4p and Mbp1p to regulate transcription at the G1/S transition; involved in meiotic gene expression; localization regulated by phosphorylation; potential Cdc28p substrate | |
| *cytoplasm* | *meiosis* | *protein binding* |
| *FIS1* | Mitochondrial outer membrane protein involved in membrane fission, required for loalization of Dnm1p and Mdv1p during mitochondrial division | |
| *mitochondrial outer membrane* | *mitochondrial fission* | *mf unknown* |
| *RTT109* | Regulator of Ty1 Transposition; Regulation of mitochondrial network; Killed in Mutagen, sensitive to diepoxybutane and/or mitomycin C; diepoxybutane and mitomycin C resistance | |
| *nucleus* | *negative regulation of DNA transposition* | *mf unknown* |
| *CAX4* | CAX4p contains 3 short stretches of amino acids that are characteristic for a wide variety of phosphatases, including lipid phosphatases and a protein phosphatase. | |
| *integral to endoplasmic reticulum membrane* | *N-linked glycosylation* | *pyrophosphatase activity* |
| *RPE1* | D-ribulose-5-Phosphate 3-epimerase | |
| *cytosol* | *pentose-phosphate shunt* | *ribulose-phosphate 3-epimerase activity* |
| *TKL1* | Transketolase 1 | |
| *cytoplasm* | *pentose-phosphate shunt* | *transketolase activity* |
| *PEX19* | 40 kDa farnesylated protein associated with peroxisomes | |
| *cytosol* | *peroxisome organization and biogenesis* | *mf unknown* |
| *OPI3* | Phospholipid methyltransferase (methylene-fatty-acyl-phospholipid synthase), catalyzes the last two steps in phosphatidylcholine biosynthesis | |
| *endoplasmic reticulum* | *phosphatidylcholine biosynthesis* | *phosphatidyl-N-methylethanolamine N-methyltransferase activity* |
| *HMO1* | Chromatin associated high mobility group (HMG) family member involved in genome maintenance; rDNA-binding component of the Pol I transcription system; associates with a 5'-3' DNA helicase and Fpr1p, a prolyl isomerase | |
| *cytoplasm* | *plasmid maintenance* | *RNA polymerase I transcription factor activity* |
| *HCR1* | Dual function protein involved in translation initiation as a substoichiometric component of eukaryotic translation initiation factor 3 (eIF3) and required for processing of 20S pre-rRNA; binds to eIF3 subunits Rpg1p and Prt1p and 18S rRNA | |
| *eukaryotic translation initiation factor 3 complex* | *protein biosynthesis* | *translation initiation factor activity* |
| *MAP1* | Methionine aminopeptidase, catalyzes the cotranslational removal of N-terminal methionine from nascent polypeptides; function is partially redundant with that of Map2p | |
| *cytosolic ribosome (sensu Eukarya)* | *proteolysis and peptidolysis* | *methionyl aminopeptidase activity* |
| *SPT4* | Protein that forms a complex with Spt5p and mediates both activation and inhibition of transcription elongation, and plays a role in pre-mRNA processing; in addition, Spt4p is involved in kinetochore function and gene silencing | |
| *nucleus* | *regulation of transcription, DNA-dependent* | *Pol II transcription elongation factor activity* |
| *PTC1* | Type 2C protein phosphatase (PP2C); inactivates the osmosensing MAPK cascade by dephosphorylating Hog1p; mutation delays mitochondrial inheritance; deletion reveals defects in precursor tRNA splicing, sporulation and cell separation | |
| *cytoplasm* | *response to osmotic stress* | *protein phosphatase type 2C activity* |
| YAP1 | bZip transcription factor required for oxidative stress tolerance; localized to the nucleus in response to the presence of oxidants | |
| *cytoplasm* | *response to oxidative stress* | *transcription factor activity* |
| OCA1 | Putative protein tyrosine phosphatase, required for cell cycle arrest in response to oxidative damage of DNA | |
| *cytoplasm* | *response to oxidative stress* | *protein tyrosine phosphatase activity* |
| ALD3 | Aldehyde dehydrogenase that uses NAD+ as the preferred coenzyme; expression is induced in response to heat shock, oxidative, and osmotic stress | |
| *cytoplasm* | *response to stress* | *aldehyde dehydrogenase activity* |
| SIW14 | Tyrosine phosphatase that plays a role in actin filament organization and endocytosis; localized to the cytoplasm | |
| *cytoplasm* | *response to stress* | *protein tyrosine phosphatase activity* |
| MRT4 | Protein involved in mRNA turnover and ribosome assembly, localizes to the nucleolus | |
| *nucleus* | *rRNA processing* | *mf unknown* |
| SUR1 | Probable catalytic subunit of a mannosylinositol phosphorylceramide (MIPC) synthase, forms a complex with probable regulatory subunit Csg2p; function in sphingolipid biosynthesis is overlapping with that of Csh1p | |
| *intracellular* | *sphingolipid biosynthesis* | *mannosyltransferase activity* |
| BMH1 | 14-3-3 protein, major isoform; binds proteins and DNA, involved in regulation of many processes including exocytosis and vesicle transport, Ras/MAPK signaling during pseudohyphal development, rapamycin-sentitive signaling, and others | |
| *nucleus* | *sporulation (sensu Fungi)* | *protein binding* |
| THI7 | Plasma membrane transporter responsible for the uptake of thiamine, member of the major facilitator superfamily of transporters; mutation of human ortholog causes thiamine-responsive megaloblastic anemia | |
| *plasma membrane* | *thiamin transport* | *thiamin transporter activity* |
| PGD1 | Subunit of the Mediator global transcriptional cofactor complex, which is part of the RNA polymerase II holoenzyme and plays an essential role in basal and activated transcription; direct target of the Cyc8p-Tup1p transcriptional corepressor | |
| *mediator complex* | *transcription from Pol II promoter* | *RNA polymerase II transcription mediator activity* |
| SRB5 | subunit of RNA polymerase II holoenzyme/mediator complex | |
| *mediator complex* | *transcription from Pol II promoter* | *RNA polymerase II transcription mediator activity* |
| GAL11 | Component of the Mediator complex; interacts with RNA polymerase II and the general transcription factors to form the RNA polymerase II holoenzyme; affects transcription by acting as target of activators and repressors | |
| *mediator complex* | *transcription from Pol II promoter* | *RNA polymerase II transcription mediator activity* |
| TIF3 | Suppressor of translation mutants; Translation initiation factor eIF-4B | |
| *ribosome* | *translational initiation* | *translation initiation factor activity* |
| VMA4 | vacuolar ATPase V1 domain subunit E (27 kDa) | |
| *vacuolar membrane (sensu Fungi)* | *vacuolar acidification* | *hydrogen-transporting ATPase activity, rotational mechanism* |

**Table S1b. Functions over-represented in the set of deletants showing no delay after LoaOOH treatment.**

| **Category** | **p-value** | **In Category from Cluster** | **k** | **f** |
| --- | --- | --- | --- | --- |
| **GO Molecular Function** |  |  |  |  |
| transcription factor [GO:0003700] | 9.5E-05 | *SNF5 PGD1 SPT4 SRB5 SNF6 SWI3 SWI6 YAP1 GAL11* | 9 | 250 |
| phosphatase [GO:0016302] | 3.9E-03 | PTC1 CAX4 SIW14 OCA1 | 4 | 85 |
| **MIPS Functional Classification** |  |  |  |  |
| regulation of C-compound and carbohydrate utilization | 2.8E-04 | *SNF5 PTC1 SNF6 PFK26 SWI3 GAL11* | 6 | 120 |
| MIPS Phenotypes |  |  |  |  |
| Multi-budded cells | 5.0E-03 | *PTC1 VMA4* | 2 | 16 |
| **MIPS Protein Complexes** |  |  |  |  |
| SWI/SNF transcription activator complex | 4.9E-05 | *SNF5 SNF6 SWI3* | 2 | 10 |
| Kornberg's mediator (SRB) complex | 5.1E-04 | *PGD1 SRB5 GAL11* | 3 | 21 |
| **GO Biological Process** |  |  |  |  |
| NADPH regeneration [GO:0006740] | 2.6E-03 | *RPE1 TKL1* | 2 | 10 |

Enrichment for functional classification categories in the set of deletant strains that fail to exhibit the Start associated delay compared to the wild-type, determined using FunSpec. The probability (p) is that of accidental enrichment and only classifications with p < 0.005 are shown. Entries of the Funspec output have been edited so that identical clusters are not ascribed to multiple classifications and general non-informative classifications have been deleted.

**Table S2. Set of genes down- and up-regulated in the *swi6* deletant microarray after LoaOOH treatment.**

| **ORF** | **Gene** | Foldexpression | **GO Cellular**  **Component** | **GO Biological**  **Process** | **GO Molecular**  **Function** |
| --- | --- | --- | --- | --- | --- |
| *YCR021C* | *HSP30* | 0.1x | plasma membrane | response to stress | mf unknown |
| *YGR088W* | *CTT1* | 0.1x | cytoplasm | response to stress | catalase activity |
| *YGR142W* | *BTN2* | 0.1x | cytosol | intracellular protein transport | mf unknown |
| *YGR211W* | *ZPR1* | 0.1x | cytoplasm | regulation of cell cycle | protein binding |
| *YKL064W* | *MNR2* | 0.1x | membrane | magnesium ion transport | magnesium ion transporter activity |
| *YLL056C* | *YLL056C* | 0.1x | cc unknown | bp unknown | mf unknown |
| *YMR169C* | *ALD3* | 0.1x | cytoplasm | response to stress | aldehyde dehydrogenase activity |
| *YNL194C* | *YNL194C* | 0.1x | cytoplasm | bp unknown | mf unknown |
| *YOR338W* | *YOR338W* | 0.1x | cc unknown | bp unknown | mf unknown |
| *YPL223C* | *GRE1* | 0.1x | cytoplasm | response to stress | mf unknown |
| *YAL005C* | *SSA1* | 0.25x | cytoplasm | protein folding | unfolded protein binding |
| *YBR031W* | *RPL4A* | 0.25x | cytosolic large ribosomal subunit (sensu Eukarya) | protein biosynthesis | structural constituent of ribosome |
| *YER103W* | *SSA4* | 0.25x | cytoplasm | response to stress | unfolded protein binding |
| *YGR281W* | *YOR1* | 0.25x | plasma membrane | transport | xenobiotic-transporting ATPase activity |
| *YHR087W* | *YHR087W* | 0.25x | cytoplasm | bp unknown | mf unknown |
| *YJR063W* | *RPA12* | 0.25x | DNA-directed RNA polymerase I complex | transcription from Pol I promoter | DNA-directed RNA polymerase activity |
| *YKL132C* | *RMA1* | 0.25x | mitochondrion | bp unknown | tetrahydrofolylpolyglutamate synthase activity |
| *YLL024C* | *SSA2* | 0.25x | cytoplasm | protein folding | ATP binding |
| *YLL038C* | *ENT4* | 0.25x | actin cortical patch (sensu Fungi) | actin filament organization | clathrin binding |
| *YLR134W* | *PDC5* | 0.25x | cytoplasm | pyruvate metabolism | pyruvate decarboxylase activity |
| *YMR316W* | *DIA1* | 0.25x | cytoplasm | pseudohyphal growth | mf unknown |
| *YNL160W* | *YGP1* | 0.25x | cell wall (sensu Fungi) | response to stress | mf unknown |
| *YNL195C* | *YNL195C* | 0.25x | mitochondrion | bp unknown | mf unknown |
| *YOL014W* | *YOL014W* | 0.25x | cc unknown | bp unknown | mf unknown |
| *YPL240C* | *HSP82* | 0.25x | cytoplasm | response to stress | ATPase activity, coupled |
| *YAL018C* | *YAL018C* | 0.5x | cc unknown | bp unknown | mf unknown |
| *YAL019W* | *FUN30* | 0.5x | nucleus | chromosome organization and biogenesis (sensu Eukarya) | mf unknown |
| *YAL034C* | *FUN19* | 0.5x | cc unknown | bp unknown | mf unknown |
| *YAL038W* | *CDC19* | 0.5x | cytosol | glycolysis | pyruvate kinase activity |
| *YAL039C* | *CYC3* | 0.5x | mitochondrial intermembrane space | cytochrome c-heme linkage | holocytochrome-c synthase activity |
| *YAL061W* | *YAL061W* | 0.5x | cytoplasm | bp unknown | oxidoreductase activity, acting on the CH-OH group of donors, NAD or NADP as acceptor |
| *YAR020C* | *PAU7* | 0.5x | cc unknown | bp unknown | mf unknown |
| *YAR023C* | *YAR023C* | 0.5x | cc unknown | bp unknown | mf unknown |
| *YAR050W* | *FLO1* | 0.5x | cell wall (sensu Fungi) | flocculation (sensu Saccharomyces) | mannose binding |
| *YBL006C* | *LDB7* | 0.5x | cc unknown | cell wall mannoprotein biosynthesis | mf unknown |
| *YBL049W* | *MOH1* | 0.5x | cc unknown | bp unknown | mf unknown |
| *YBL067C* | *UBP13* | 0.5x | cc unknown | bp unknown | ubiquitin-specific protease activity |
| *YBL075C* | *SSA3* | 0.5x | cytosol | response to stress | ATPase activity |
| *YBL083C* | *YBL083C* | 0.5x | - | - | - |
| *YBR046C* | *ZTA1* | 0.5x | cytoplasm | bp unknown | mf unknown |
| *YBR054W* | *YRO2* | 0.5x | bud | bp unknown | mf unknown |
| *YBR058C* | *UBP14* | 0.5x | cytoplasm | protein deubiquitination | ubiquitin-specific protease activity |
| *YBR069C* | *TAT1* | 0.5x | plasma membrane | amino acid transport | amino acid transporter activity |
| *YBR072W* | *HSP26* | 0.5x | cytoplasm | response to stress | unfolded protein binding |
| *YBR079C* | *RPG1* | 0.5x | cytoplasm | translational initiation | translation initiation factor activity |
| *YBR082C* | *UBC4* | 0.5x | proteasome complex (sensu Eukarya) | response to stress | ubiquitin conjugating enzyme activity |
| *YBR092C* | *PHO3* | 0.5x | periplasmic space (sensu Fungi) | thiamin transport | acid phosphatase activity |
| *YBR118W* | *TEF2* | 0.5x | ribosome | translational elongation | translation elongation factor activity |
| *YBR126C* | *TPS1* | 0.5x | cytoplasm | response to stress | alpha,alpha-trehalose-phosphate synthase (UDP-forming) activity |
| *YBR169C* | *SSE2* | 0.5x | cytoplasm | protein folding | mf unknown |
| *YBR190W* | *YBR190W* | 0.5x | - | - | - |
| *YBR267W* | *REI1* | 0.5x | cytoplasm | bud growth | mf unknown |
| *YBR286W* | *APE3* | 0.5x | vacuole (sensu Fungi) | vacuolar protein catabolism | aminopeptidase activity |
| *YCL037C* | *SRO9* | 0.5x | polysome | protein biosynthesis | RNA binding |
| *YCL040W* | *GLK1* | 0.5x | cytosol | carbohydrate metabolism | glucokinase activity |
| *YCR012W* | *PGK1* | 0.5x | cytoplasm | gluconeogenesis | phosphoglycerate kinase activity |
| *YCR025C* | *YCR025C* | 0.5x | - | - | - |
| *YDL045C* | *FAD1* | 0.5x | cytoplasm | FAD biosynthesis | FMN adenylyltransferase activity |
| *YDL059C* | *RAD59* | 0.5x | nucleus | telomerase-independent telomere maintenance | protein binding |
| *YDL072C* | *YDL072C* | 0.5x | endoplasmic reticulum | bp unknown | mf unknown |
| *YDL204W* | *RTN2* | 0.5x | endoplasmic reticulum | bp unknown | mf unknown |
| *YDL223C* | *HBT1* | 0.5x | shmoo tip | cellular morphogenesis during conjugation with cellular fusion | mf unknown |
| *YDL241W* | *YDL241W* | 0.5x | cc unknown | bp unknown | mf unknown |
| *YDL244W* | *THI13* | 0.5x | cc unknown | thiamin biosynthesis | mf unknown |
| *YDR011W* | *SNQ2* | 0.5x | plasma membrane | response to drug | xenobiotic-transporting ATPase activity |
| *YDR012W* | *RPL4B* | 0.5x | cytoplasm | protein biosynthesis | structural constituent of ribosome |
| *YDR064W* | *RPS13* | 0.5x | cytosolic small ribosomal subunit (sensu Eukarya) | protein biosynthesis | structural constituent of ribosome |
| *YDR096W* | *GIS1* | 0.5x | nucleus | phospholipid metabolism | transcription factor activity |
| *YDR140W* | *YDR140W* | 0.5x | cytoplasm | bp unknown | S-adenosylmethionine-dependent methyltransferase activity |
| *YDR171W* | *HSP42* | 0.5x | cytoplasm | response to stress | unfolded protein binding |
| *YDR204W* | *COQ4* | 0.5x | mitochondrial inner membrane | ubiquinone metabolism | mf unknown |
| *YDR247W* | *VHS1* | 0.5x | cytoplasm | protein amino acid phosphorylation | protein kinase activity |
| *YDR258C* | *HSP78* | 0.5x | mitochondrial matrix | response to stress | unfolded protein binding |
| *YDR342C* | *HXT7* | 0.5x | plasma membrane | hexose transport | glucose transporter activity |
| *YDR343C* | *HXT6* | 0.5x | plasma membrane | hexose transport | glucose transporter activity |
| *YDR406W* | *PDR15* | 0.5x | integral to membrane | transport | ATPase activity, coupled to transmembrane movement of substances |
| *YDR441C* | *APT2* | 0.5x | cytoplasm | bp unknown | mf unknown |
| *YDR460W* | *TFB3* | 0.5x | transcription factor TFIIH complex | transcription initiation from Pol II promoter | general RNA polymerase II transcription factor activity |
| *YDR506C* | *YDR506C* | 0.5x | cc unknown | bp unknown | mf unknown |
| *YDR516C* | *EMI2* | 0.5x | cytoplasm | sporulation (sensu Fungi) | mf unknown |
| *YEL029C* | *BUD16* | 0.5x | cytoplasm | bud site selection | mf unknown |
| *YER036C* | *YER036C* | 0.5x | cytoplasm | bp unknown | ATPase activity, coupled to transmembrane movement of substances |
| *YER053C* | *PIC2* | 0.5x | mitochondrion | phosphate transport | inorganic phosphate transporter activity |
| *YER113C* | *YER113C* | 0.5x | Golgi apparatus | bp unknown | mf unknown |
| *YER130C* | *YER130C* | 0.5x | cc unknown | bp unknown | mf unknown |
| *YER150W* | *SPI1* | 0.5x | cell wall (sensu Fungi) | bp unknown | mf unknown |
| *YFL030W* | *AGX1* | 0.5x | cc unknown | glycine biosynthesis | alanine-glyoxylate transaminase activity |
| *YFR031C* | *SMC2* | 0.5x | nuclear condensin complex | mitotic sister chromatid segregation | ATPase activity |
| *YFR036W* | *CDC26* | 0.5x | anaphase-promoting complex | ubiquitin-dependent protein catabolism | protein binding |
| *YFR046C* | *YFR046C* | 0.5x | nucleus | meiosis | mf unknown |
| *YFR048W* | *RMD8* | 0.5x | cytoplasm | bp unknown | mf unknown |
| *YFR053C* | *HXK1* | 0.5x | cytosol | fructose metabolism | hexokinase activity |
| *YGL008C* | *PMA1* | 0.5x | plasma membrane | regulation of pH | hydrogen-exporting ATPase activity, phosphorylative mechanism |
| *YGL093W* | *SPC105* | 0.5x | spindle pole body | microtubule nucleation | structural constituent of cytoskeleton |
| *YGL154C* | *LYS5* | 0.5x | cytoplasm | lysine biosynthesis, aminoadipic pathway | holo-[acyl-carrier protein] synthase activity |
| *YGL157W* | *YGL157W* | 0.5x | cytoplasm | bp unknown | oxidoreductase activity |
| *YGR005C* | *TFG2* | 0.5x | transcription factor TFIIF complex | transcription initiation from Pol II promoter | general RNA polymerase II transcription factor activity |
| *YGR043C* | *YGR043C* | 0.5x | nucleus | bp unknown | transaldolase activity |
| *YGR052W* | *YGR052W* | 0.5x | mitochondrion | bp unknown | kinase activity |
| *YGR055W* | *MUP1* | 0.5x | integral to plasma membrane | sulfur amino acid transport | L-methionine porter activity |
| *YGR070W* | *ROM1* | 0.5x | intracellular | cell wall organization and biogenesis | signal transducer activity |
| *YGR082W* | *TOM20* | 0.5x | mitochondrial outer membrane translocase complex | mitochondrial matrix protein import | protein transporter activity |
| *YGR086C* | *PIL1* | 0.5x | cytoplasm | response to heat | protein kinase inhibitor activity |
| *YGR095C* | *RRP46* | 0.5x | nuclear exosome (RNase complex) | 35S primary transcript processing | 3'-5'-exoribonuclease activity |
| *YGR112W* | *SHY1* | 0.5x | mitochondrial inner membrane | aerobic respiration | unfolded protein binding |
| *YGR192C* | *TDH3* | 0.5x | cytoplasm | gluconeogenesis | glyceraldehyde-3-phosphate dehydrogenase (phosphorylating) activity |
| *YGR198W* | *YGR198W* | 0.5x | cytoplasm | MAPKKK cascade | transferase activity |
| *YGR201C* | *YGR201C* | 0.5x | cc unknown | bp unknown | mf unknown |
| *YGR243W* | *YGR243W* | 0.5x | mitochondrion | bp unknown | mf unknown |
| *YGR248W* | *SOL4* | 0.5x | cytoplasm | bp unknown | 6-phosphogluconolactonase activity |
| *YGR250C* | *YGR250C* | 0.5x | cytoplasm | bp unknown | RNA binding |
| *YGR253C* | *PUP2* | 0.5x | proteasome core complex (sensu Eukarya) | ubiquitin-dependent protein catabolism | endopeptidase activity |
| *YGR254W* | *ENO1* | 0.5x | cytoplasm | gluconeogenesis | phosphopyruvate hydratase activity |
| *YGR266W* | *YGR266W* | 0.5x | plasma membrane | bp unknown | mf unknown |
| *YGR285C* | *ZUO1* | 0.5x | cytoplasm | protein folding | unfolded protein binding |
| *YHL007C* | *STE20* | 0.5x | shmoo tip | protein amino acid phosphorylation | protein serine/threonine kinase activity |
| *YHL008C* | *YHL008C* | 0.5x | vacuole (sensu Fungi) | bp unknown | transporter activity |
| *YHR048W* | *YHR048W* | 0.5x | integral to membrane | drug transport | drug transporter activity |
| *YHR049W* | *FSH1* | 0.5x | cytoplasm | bp unknown | serine hydrolase activity |
| *YHR052W* | *CIC1* | 0.5x | nucleolus | protein catabolism | protein binding, bridging |
| *YHR053C* | *CUP1-1* | 0.5x | cytosol | response to copper ion | copper ion binding |
| *YHR094C* | *HXT1* | 0.5x | plasma membrane | hexose transport | glucose transporter activity |
| *YHR104W* | *GRE3* | 0.5x | cytoplasm | response to stress | aldo-keto reductase activity |
| *YHR138C* | *YHR138C* | 0.5x | cc unknown | vacuole fusion, non-autophagic | endopeptidase inhibitor activity |
| *YHR169W* | *DBP8* | 0.5x | nucleolus | 35S primary transcript processing | ATP-dependent RNA helicase activity |
| *YHR174W* | *ENO2* | 0.5x | soluble fraction | gluconeogenesis | phosphopyruvate hydratase activity |
| *YHR179W* | *OYE2* | 0.5x | cytoplasm | bp unknown | NADPH dehydrogenase activity |
| *YHR183W* | *GND1* | 0.5x | cytoplasm | glucose metabolism | phosphogluconate dehydrogenase (decarboxylating) activity |
| *YHR203C* | *RPS4B* | 0.5x | cytosolic small ribosomal subunit (sensu Eukarya) | protein biosynthesis | structural constituent of ribosome |
| *YHR216W* | *IMD2* | 0.5x | cytoplasm | GTP biosynthesis | IMP dehydrogenase activity |
| *YIL018W* | *RPL2B* | 0.5x | cytosolic large ribosomal subunit (sensu Eukarya) | protein biosynthesis | structural constituent of ribosome |
| *YIL053W* | *RHR2* | 0.5x | cytoplasm | response to osmotic stress | glycerol-1-phosphatase activity |
| *YIL056W* | *YIL056W* | 0.5x | cytoplasm | bp unknown | mf unknown |
| *YIL062C* | *ARC15* | 0.5x | mitochondrial membrane | actin cortical patch assembly | structural molecule activity |
| *YIL087C* | *YIL087C* | 0.5x | mitochondrion | bp unknown | mf unknown |
| *YIL157C* | *YIL157C* | 0.5x | mitochondrion | bp unknown | mf unknown |
| *YIR019C* | *MUC1* | 0.5x | plasma membrane | pseudohyphal growth | mf unknown |
| *YJL066C* | *MPM1* | 0.5x | mitochondrion | bp unknown | mf unknown |
| *YJL144W* | *YJL144W* | 0.5x | cytoplasm | response to dessication | mf unknown |
| *YJL213W* | *YJL213W* | 0.5x | cc unknown | bp unknown | mf unknown |
| *YJR004C* | *SAG1* | 0.5x | cell wall (sensu Fungi) | agglutination during conjugation with cellular fusion | cell adhesion molecule binding |
| *YJR009C* | *TDH2* | 0.5x | cytoplasm | gluconeogenesis | glyceraldehyde-3-phosphate dehydrogenase (phosphorylating) activity |
| *YJR055W* | *HIT1* | 0.5x | cytoplasm | bp unknown | mf unknown |
| *YJR096W* | *YJR096W* | 0.5x | cytoplasm | arabinose metabolism | aldo-keto reductase activity |
| *YJR108W* | *ABM1* | 0.5x | cc unknown | microtubule cytoskeleton organization and biogenesis | mf unknown |
| *YKL032C* | *IXR1* | 0.5x | nuclear chromosome | DNA repair | DNA binding |
| *YKL035W* | *UGP1* | 0.5x | cytoplasm | protein amino acid glycosylation | UTP-glucose-1-phosphate uridylyltransferase activity |
| *YKL051W* | *SFK1* | 0.5x | plasma membrane | actin cytoskeleton organization and biogenesis | mf unknown |
| *YKL062W* | *MSN4* | 0.5x | cytoplasm | response to stress | DNA binding |
| *YKL071W* | *YKL071W* | 0.5x | cytoplasm | bp unknown | mf unknown |
| *YKL096W* | *CWP1* | 0.5x | cell wall (sensu Fungi) | cell wall organization and biogenesis | structural constituent of cell wall |
| *YKL177W* | *YKL177W* | 0.5x | - | - | - |
| *YKL216W* | *URA1* | 0.5x | cytoplasm | pyrimidine base biosynthesis | dihydroorotate dehydrogenase activity |
| *YKR005C* | *YKR005C* | 0.5x | cc unknown | bp unknown | mf unknown |
| *YKR069W* | *MET1* | 0.5x | cc unknown | methionine metabolism | uroporphyrin-III C-methyltransferase activity |
| *YKR076W* | *ECM4* | 0.5x | cytoplasm | cell wall organization and biogenesis | mf unknown |
| *YLL023C* | *YLL023C* | 0.5x | endoplasmic reticulum | bp unknown | mf unknown |
| *YLL026W* | *HSP104* | 0.5x | cytoplasm | response to stress | chaperone binding |
| *YLL028W* | *TPO1* | 0.5x | plasma membrane | polyamine transport | spermine transporter activity |
| *YLL036C* | *PRP19* | 0.5x | cytoplasm | nuclear mRNA splicing, via spliceosome | pre-mRNA splicing factor activity |
| *YLL060C* | *GTT2* | 0.5x | cell | glutathione metabolism | glutathione transferase activity |
| *YLL064C* | *YLL064C* | 0.5x | cc unknown | bp unknown | mf unknown |
| *YLR064W* | *YLR064W* | 0.5x | endoplasmic reticulum | bp unknown | mf unknown |
| *YLR099C* | *ICT1* | 0.5x | cc unknown | bp unknown | mf unknown |
| *YLR109W* | *AHP1* | 0.5x | cytoplasm | regulation of cell redox homeostasis | thioredoxin peroxidase activity |
| *YLR115W* | *CFT2* | 0.5x | mRNA cleavage and polyadenylation specificity factor complex | mRNA polyadenylylation | cleavage and polyadenylylation specificity factor activity |
| *YLR151C* | *PCD1* | 0.5x | peroxisome | bp unknown | pyrophosphatase activity |
| *YLR216C* | *CPR6* | 0.5x | cytoplasm | protein folding | unfolded protein binding |
| *YLR252W* | *YLR252W* | 0.5x | - | - | - |
| *YLR258W* | *GSY2* | 0.5x | cytoplasm | glycogen metabolism | glycogen (starch) synthase activity |
| *YLR327C* | *YLR327C* | 0.5x | cytoplasm | bp unknown | mf unknown |
| *YLR332W* | *MID2* | 0.5x | integral to plasma membrane | cell wall organization and biogenesis | transmembrane receptor activity |
| *YLR340W* | *RPP0* | 0.5x | cytosolic large ribosomal subunit (sensu Eukarya) | protein biosynthesis | structural constituent of ribosome |
| *YLR350W* | *ORM2* | 0.5x | endoplasmic reticulum | response to unfolded protein | mf unknown |
| *YML013W* | *SEL1* | 0.5x | endoplasmic reticulum | protein secretion | mf unknown |
| *YML014W* | *TRM9* | 0.5x | cytoplasm | response to stress | tRNA methyltransferase activity |
| *YML078W* | *CPR3* | 0.5x | mitochondrion | protein folding | peptidyl-prolyl cis-trans isomerase activity |
| *YMR011W* | *HXT2* | 0.5x | plasma membrane | hexose transport | glucose transporter activity |
| *YMR020W* | *FMS1* | 0.5x | cytoplasm | pantothenate biosynthesis | amine oxidase activity |
| *YMR021C* | *MAC1* | 0.5x | nucleus | positive regulation of transcription from Pol II promoter | specific RNA polymerase II transcription factor activity |
| *YMR034C* | *YMR034C* | 0.5x | cc unknown | bp unknown | sterol transporter activity |
| *YMR040W* | *YMR040W* | 0.5x | integral to membrane | bp unknown | mf unknown |
| *YMR053C* | *STB2* | 0.5x | nucleus | histone deacetylation | transcriptional repressor activity |
| *YMR056C* | *AAC1* | 0.5x | mitochondrial inner membrane | aerobic respiration | ATP:ADP antiporter activity |
| *YMR062C* | *ECM40* | 0.5x | mitochondrial matrix | cell wall organization and biogenesis | amino-acid N-acetyltransferase activity |
| *YMR105C* | *PGM2* | 0.5x | cytosol | glucose 1-phosphate utilization | phosphoglucomutase activity |
| *YMR116C* | *ASC1* | 0.5x | cytoplasm | bp unknown | mf unknown |
| *YMR139W* | *RIM11* | 0.5x | cytoplasm | protein amino acid phosphorylation | glycogen synthase kinase 3 activity |
| *YMR175W* | *SIP18* | 0.5x | soluble fraction | response to osmotic stress | phospholipid binding |
| *YMR186W* | *HSC82* | 0.5x | cytoplasm | response to stress | unfolded protein binding |
| *YMR203W* | *TOM40* | 0.5x | mitochondrion | mitochondrial matrix protein import | protein transporter activity |
| *YMR274C* | *RCE1* | 0.5x | integral to endoplasmic reticulum membrane | protein processing | prenyl-dependent CAAX protease activity |
| *YMR281W* | *GPI12* | 0.5x | endoplasmic reticulum membrane | GPI anchor biosynthesis | N-acetylglucosaminylphosphatidylinositol deacetylase activity |
| *YMR305C* | *SCW10* | 0.5x | cytoplasm | conjugation with cellular fusion | glucosidase activity |
| *YMR315W* | *YMR315W* | 0.5x | cytoplasm | bp unknown | mf unknown |
| *YMR318C* | *ADH6* | 0.5x | soluble fraction | aldehyde metabolism | alcohol dehydrogenase (NADP+) activity |
| *YMR324C* | *YMR324C* | 0.5x | - | - | - |
| *YNL007C* | *SIS1* | 0.5x | cytosolic small ribosomal subunit (sensu Eukarya) | translational initiation | unfolded protein binding |
| *YNL013C* | *YNL013C* | 0.5x | - | - | - |
| *YNL042W* | *YNL042W* | 0.5x | cytoplasm | bp unknown | mf unknown |
| *YNL064C* | *YDJ1* | 0.5x | cytosol | protein-mitochondrial targeting | chaperone regulator activity |
| *YNL100W* | *YNL100W* | 0.5x | mitochondrion | bp unknown | mf unknown |
| *YNL107W* | *YAF9* | 0.5x | cytoplasm | chromatin remodeling | mf unknown |
| *YNL199C* | *GCR2* | 0.5x | nucleus | positive regulation of transcription from Pol II promoter | transcriptional activator activity |
| *YNL280C* | *ERG24* | 0.5x | endoplasmic reticulum | ergosterol biosynthesis | C-14 sterol reductase activity |
| *YNL301C* | *RPL18B* | 0.5x | cytosolic large ribosomal subunit (sensu Eukarya) | protein biosynthesis | structural constituent of ribosome |
| *YNR034W* | *SOL1* | 0.5x | cytoplasm | tRNA processing | 6-phosphogluconolactonase activity |
| *YNR048W* | *YNR048W* | 0.5x | cc unknown | bp unknown | transcription regulator activity |
| *YNR067C* | *DSE4* | 0.5x | cell wall (sensu Fungi) | cytokinesis, completion of separation | glucan 1,3-beta-glucosidase activity |
| *YOL016C* | *CMK2* | 0.5x | cytoplasm | protein amino acid phosphorylation | calcium- and calmodulin-dependent protein kinase activity |
| *YOL032W* | *YOL032W* | 0.5x | cytoplasm | bp unknown | mf unknown |
| *YOL039W* | *RPP2A* | 0.5x | cytosolic large ribosomal subunit (sensu Eukarya) | protein biosynthesis | structural constituent of ribosome |
| *YOL050C* | *YOL050C* | 0.5x | - | - | - |
| *YOL052C* | *SPE2* | 0.5x | cytoplasm | pantothenate biosynthesis | adenosylmethionine decarboxylase activity |
| *YOL120C* | *RPL18A* | 0.5x | cytosolic large ribosomal subunit (sensu Eukarya) | protein biosynthesis | structural constituent of ribosome |
| *YOL143C* | *RIB4* | 0.5x | cytoplasm | vitamin B2 biosynthesis | 6,7-dimethyl-8-ribityllumazine synthase activity |
| *YOL159C* | *YOL159C* | 0.5x | soluble fraction | bp unknown | mf unknown |
| *YOL166C* | *YOL166C* | 0.5x | - | - | - |
| *YOR027W* | *STI1* | 0.5x | cytoplasm | protein folding | unfolded protein binding |
| *YOR030W* | *DFG16* | 0.5x | cc unknown | invasive growth (sensu Saccharomyces) | mf unknown |
| *YOR036W* | *PEP12* | 0.5x | Golgi apparatus | Golgi to vacuole transport | t-SNARE activity |
| *YOR062C* | *YOR062C* | 0.5x | cytoplasm | bp unknown | mf unknown |
| *YOR063W* | *RPL3* | 0.5x | cytosolic large ribosomal subunit (sensu Eukarya) | protein biosynthesis | structural constituent of ribosome |
| *YOR085W* | *OST3* | 0.5x | integral to membrane | protein complex assembly | dolichyl-diphosphooligosaccharide-protein glycotransferase activity |
| *YOR094W* | *ARF3* | 0.5x | cc unknown | intracellular protein transport | GTPase activity |
| *YOR133W* | *EFT1* | 0.5x | ribosome | translational elongation | translation elongation factor activity |
| *YOR142W* | *LSC1* | 0.5x | mitochondrion | tricarboxylic acid cycle | succinate-CoA ligase (ADP-forming) activity |
| *YOR153W* | *PDR5* | 0.5x | plasma membrane | response to drug | xenobiotic-transporting ATPase activity |
| *YOR173W* | *DCS2* | 0.5x | cytoplasm | bp unknown | mf unknown |
| *YOR185C* | *GSP2* | 0.5x | nucleus | nuclear organization and biogenesis | GTPase activity |
| *YOR220W* | *YOR220W* | 0.5x | cytoplasm | bp unknown | mf unknown |
| *YOR273C* | *TPO4* | 0.5x | plasma membrane | polyamine transport | spermine transporter activity |
| *YOR344C* | *TYE7* | 0.5x | nucleus | transcription | transcription factor activity |
| *YOR374W* | *ALD4* | 0.5x | mitochondrion | ethanol metabolism | aldehyde dehydrogenase (NAD) activity |
| *YOR384W* | *FRE5* | 0.5x | mitochondrion | bp unknown | ferric-chelate reductase activity |
| *YOR385W* | *YOR385W* | 0.5x | cytoplasm | bp unknown | mf unknown |
| *YPL031C* | *PHO85* | 0.5x | nucleus | protein amino acid phosphorylation | cyclin-dependent protein kinase activity |
| *YPL036W* | *PMA2* | 0.5x | plasma membrane | regulation of pH | hydrogen-exporting ATPase activity, phosphorylative mechanism |
| *YPL057C* | *SUR1* | 0.5x | intracellular | sphingolipid biosynthesis | mannosyltransferase activity |
| *YPL061W* | *ALD6* | 0.5x | cytoplasm | acetate biosynthesis | aldehyde dehydrogenase activity |
| *YPL126W* | *NAN1* | 0.5x | small nucleolar ribonucleoprotein complex | processing of 20S pre-rRNA | snoRNA binding |
| *YPL128C* | *TBF1* | 0.5x | nucleus | loss of chromatin silencing | DNA binding |
| *YPL131W* | *RPL5* | 0.5x | cytosolic large ribosomal subunit (sensu Eukarya) | protein biosynthesis | structural constituent of ribosome |
| *YPL135W* | *ISU1* | 0.5x | mitochondrion | iron ion homeostasis | protein binding |
| *YPL171C* | *OYE3* | 0.5x | cc unknown | bp unknown | NADPH dehydrogenase activity |
| *YPL198W* | *RPL7B* | 0.5x | cytosolic large ribosomal subunit (sensu Eukarya) | protein biosynthesis | structural constituent of ribosome |
| *YPL220W* | *RPL1A* | 0.5x | cytosolic large ribosomal subunit (sensu Eukarya) | protein biosynthesis | structural constituent of ribosome |
| *YPL239W* | *YAR1* | 0.5x | cytoplasm | bp unknown | mf unknown |
| *YPL250C* | *ICY2* | 0.5x | cc unknown | bp unknown | mf unknown |
| *YPL259C* | *APM1* | 0.5x | AP-1 adaptor complex | vesicle-mediated transport | clathrin binding |
| *YPR028W* | *YOP1* | 0.5x | membrane | membrane organization and biogenesis | mf unknown |
| *YPR030W* | *CSR2* | 0.5x | nucleus | cell wall organization and biogenesis | mf unknown |
| *YPR032W* | *SRO7* | 0.5x | plasma membrane | exocytosis | mf unknown |
| *YPR060C* | *ARO7* | 0.5x | cytoplasm | aromatic amino acid family biosynthesis | chorismate mutase activity |
| *YPR074C* | *TKL1* | 0.5x | cytoplasm | pentose-phosphate shunt | transketolase activity |
| *YPR140W* | *TAZ1* | 0.5x | mitochondrion | phospholipid biosynthesis | acyltransferase activity |
| *YPR160W* | *GPH1* | 0.5x | cytoplasm | glycogen catabolism | glycogen phosphorylase activity |
| *YAL035W* | *FUN12* | 2x | cytosolic small ribosomal subunit (sensu Eukarya) | translational initiation | GTPase activity |
| *YAR060C* | *YAR060C* | 2x | - | - | - |
| *YBL018C* | *POP8* | 2x | ribonuclease MRP complex | rRNA processing | ribonuclease P activity |
| *YBL028C* | *YBL028C* | 2x | nucleus | bp unknown | mf unknown |
| *YBL052C* | *SAS3* | 2x | nuclear nucleosome | chromatin silencing at telomere | histone acetyltransferase activity |
| *YBL111C* | *YBL111C* | 2x | cc unknown | bp unknown | mf unknown |
| *YBL113C* | *YBL113C* | 2x | cc unknown | bp unknown | helicase activity |
| *YBR252W* | *DUT1* | 2x | cytoplasm | pyrimidine deoxyribonucleoside triphosphate catabolism | dUTP diphosphatase activity |
| *YBR268W* | *MRPL37* | 2x | mitochondrial large ribosomal subunit | protein biosynthesis | structural constituent of ribosome |
| *YCL030C* | *HIS4* | 2x | cell | histidine biosynthesis | phosphoribosyl-ATP diphosphatase activity |
| *YCL055W* | *KAR4* | 2x | nucleus | meiosis | transcription regulator activity |
| *YCR035C* | *RRP43* | 2x | nuclear exosome (RNase complex) | 35S primary transcript processing | 3'-5'-exoribonuclease activity |
| *YCR097W* | *HMRA1* | 2x | nucleus | regulation of transcription, mating-type specific | transcription corepressor activity |
| *YCR104W* | *PAU3* | 2x | cc unknown | bp unknown | mf unknown |
| *YDL055C* | *PSA1* | 2x | cytoplasm | protein amino acid glycosylation | mannose-1-phosphate guanylyltransferase activity |
| *YDL056W* | *MBP1* | 2x | nucleus | regulation of cell cycle | DNA binding |
| *YDL069C* | *CBS1* | 2x | mitochondrial inner membrane | protein biosynthesis | translation factor activity, nucleic acid binding |
| *YDL073W* | *YDL073W* | 2x | cc unknown | bp unknown | mf unknown |
| *YDL088C* | *ASM4* | 2x | nuclear pore | mRNA-nucleus export | structural molecule activity |
| *YDL089W* | *YDL089W* | 2x | cc unknown | bp unknown | mf unknown |
| *YDL100C* | *ARR4* | 2x | endoplasmic reticulum | response to heat | ATPase activity |
| *YDL101C* | *DUN1* | 2x | nucleus | protein amino acid phosphorylation | protein kinase activity |
| *YDL102W* | *CDC2* | 2x | delta DNA polymerase complex | lagging strand elongation | delta DNA polymerase activity |
| *YDL121C* | *YDL121C* | 2x | endoplasmic reticulum | bp unknown | mf unknown |
| *YDL122W* | *UBP1* | 2x | cytoplasm | protein deubiquitination | ubiquitin-specific protease activity |
| *YDL142C* | *CRD1* | 2x | mitochondrial membrane | lipid biosynthesis | cardiolipin synthase activity |
| *YDL148C* | *NOP14* | 2x | nucleus | processing of 20S pre-rRNA | snoRNA binding |
| *YDL155W* | *CLB3* | 2x | cytoplasm | G2/M transition of mitotic cell cycle | cyclin-dependent protein kinase regulator activity |
| *YDL157C* | *YDL157C* | 2x | mitochondrion | bp unknown | mf unknown |
| *YDL189W* | *RBS1* | 2x | cytoplasm | bp unknown | mf unknown |
| *YDL208W* | *NHP2* | 2x | small nuclear ribonucleoprotein complex | rRNA modification | RNA binding |
| *YDL217C* | *TIM22* | 2x | mitochondrial inner membrane protein insertion complex | mitochondrial inner membrane protein import | protein transporter activity |
| *YDL219W* | *DTD1* | 2x | cytoplasm | D-amino acid catabolism | hydrolase activity, acting on ester bonds |
| *YDL227C* | *HO* | 2x | nucleus | mating-type switching and recombination | endonuclease activity |
| *YDR030C* | *RAD28* | 2x | nucleus | DNA repair | mf unknown |
| *YDR052C* | *DBF4* | 2x | nucleoplasm | protein amino acid phosphorylation | protein serine/threonine kinase activity |
| *YDR075W* | *PPH3* | 2x | cytoplasm | protein amino acid dephosphorylation | protein phosphatase type 2A activity |
| *YDR086C* | *SSS1* | 2x | translocon | cotranslational membrane targeting | protein transporter activity |
| *YDR097C* | *MSH6* | 2x | nucleus | mismatch repair | DNA binding |
| *YDR098C* | *GRX3* | 2x | intracellular | response to oxidative stress | thiol-disulfide exchange intermediate activity |
| *YDR127W* | *ARO1* | 2x | cytoplasm | aromatic amino acid family biosynthesis | 3-dehydroquinate dehydratase activity |
| *YDR143C* | *SAN1* | 2x | cc unknown | establishment and/or maintenance of chromatin architecture | mf unknown |
| *YDR201W* | *SPC19* | 2x | spindle pole body | mitotic spindle assembly (sensu Fungi) | structural constituent of cytoskeleton |
| *YDR213W* | *UPC2* | 2x | cytoplasm | sterol biosynthesis | RNA polymerase II transcription factor activity |
| *YDR254W* | *CHL4* | 2x | condensed nuclear chromosome kinetochore | chromosome segregation | DNA binding |
| *YDR309C* | *GIC2* | 2x | bud tip | establishment of cell polarity (sensu Fungi) | small GTPase regulatory/interacting protein activity |
| *YDR315C* | *IPK1* | 2x | nucleus | myo-inositol metabolism | inositol or phosphatidylinositol kinase activity |
| *YDR316W* | *OMS1* | 2x | mitochondrion | bp unknown | S-adenosylmethionine-dependent methyltransferase activity |
| *YDR348C* | *YDR348C* | 2x | bud neck | bp unknown | mf unknown |
| *YDR357C* | *YDR357C* | 2x | cytoplasm | bp unknown | mf unknown |
| *YDR379W* | *RGA2* | 2x | intracellular | establishment of cell polarity (sensu Fungi) | signal transducer activity |
| *YDR390C* | *UBA2* | 2x | nucleus | protein sumoylation | SUMO activating enzyme activity |
| *YDR399W* | *HPT1* | 2x | cytoplasm | purine nucleotide biosynthesis | hypoxanthine phosphoribosyltransferase activity |
| *YDR409W* | *SIZ1* | 2x | septin ring | protein sumoylation | SUMO ligase activity |
| *YDR490C* | *PKH1* | 2x | cytosol | protein amino acid phosphorylation | protein kinase activity |
| *YDR507C* | *GIN4* | 2x | bud neck | protein amino acid phosphorylation | protein kinase activity |
| *YDR512C* | *EMI1* | 2x | cc unknown | sporulation (sensu Fungi) | mf unknown |
| *YEL044W* | *IES6* | 2x | nucleus | metabolism | mf unknown |
| *YEL051W* | *VMA8* | 2x | vacuolar membrane (sensu Fungi) | vacuolar acidification | hydrogen-transporting ATPase activity, rotational mechanism |
| *YEL061C* | *CIN8* | 2x | spindle microtubule | mitotic sister chromatid segregation | microtubule motor activity |
| *YER001W* | *MNN1* | 2x | Golgi apparatus | O-linked glycosylation | alpha-1,3-mannosyltransferase activity |
| *YER030W* | *YER030W* | 2x | nucleus | bp unknown | mf unknown |
| *YER042W* | *MXR1* | 2x | cytoplasm | response to oxidative stress | protein-methionine-S-oxide reductase activity |
| *YER054C* | *GIP2* | 2x | protein phosphatase type 1 complex | protein amino acid dephosphorylation | protein phosphatase regulator activity |
| *YER055C* | *HIS1* | 2x | cell | histidine biosynthesis | ATP phosphoribosyltransferase activity |
| *YER057C* | *HMF1* | 2x | cytoplasm | bp unknown | mf unknown |
| *YER058W* | *PET117* | 2x | mitochondrial inner membrane | cytochrome c oxidase biogenesis | mf unknown |
| *YER084W* | *YER084W* | 2x | - | - | - |
| *YER085C* | *YER085C* | 2x | cc unknown | bp unknown | mf unknown |
| *YER122C* | *GLO3* | 2x | ER-Golgi intermediate compartment | ER to Golgi transport | ARF GTPase activator activity |
| *YER163C* | *YER163C* | 2x | cytoplasm | bp unknown | mf unknown |
| *YER168C* | *CCA1* | 2x | cytoplasm | tRNA modification | tRNA adenylyltransferase activity |
| *YER170W* | *ADK2* | 2x | mitochondrial inner membrane | bp unknown | adenylate kinase activity |
| *YER182W* | *YER182W* | 2x | mitochondrion | bp unknown | mf unknown |
| *YFL008W* | *SMC1* | 2x | nuclear cohesin complex | mitotic sister chromatid segregation | ATPase activity |
| *YFL014W* | *HSP12* | 2x | cytoplasm | response to oxidative stress | mf unknown |
| *YFL046W* | *YFL046W* | 2x | mitochondrion | bp unknown | mf unknown |
| *YFL054C* | *YFL054C* | 2x | integral to membrane | water transport | transporter activity |
| *YFL066C* | *YFL066C* | 2x | cc unknown | bp unknown | mf unknown |
| *YGL009C* | *LEU1* | 2x | cytosol | leucine biosynthesis | 3-isopropylmalate dehydratase activity |
| *YGL010W* | *YGL010W* | 2x | endoplasmic reticulum | bp unknown | mf unknown |
| *YGL039W* | *YGL039W* | 2x | cytoplasm | bp unknown | oxidoreductase activity |
| *YGL049C* | *TIF4632* | 2x | ribosome | translational initiation | translation initiation factor activity |
| *YGL088W* | *YGL088W* | 2x | - | - | - |
| *YGL114W* | *YGL114W* | 2x | membrane | transport | oligopeptide transporter activity |
| *YGL130W* | *CEG1* | 2x | nucleus | mRNA capping | mRNA guanylyltransferase activity |
| *YGL144C* | *ROG1* | 2x | cc unknown | lipid metabolism | lipase activity |
| *YGL201C* | *MCM6* | 2x | cytoplasm | DNA replication initiation | chromatin binding |
| *YGL203C* | *KEX1* | 2x | Golgi trans face | protein processing | carboxypeptidase D activity |
| *YGL219C* | *MDM34* | 2x | cytoplasm | mitochondrion organization and biogenesis | mf unknown |
| *YGR027C* | *RPS25A* | 2x | cytosolic small ribosomal subunit (sensu Eukarya) | protein biosynthesis | structural constituent of ribosome |
| *YGR037C* | *ACB1* | 2x | cytoplasm | fatty acid metabolism | long-chain fatty acid transporter activity |
| *YGR128C* | *UTP8* | 2x | small nucleolar ribonucleoprotein complex | processing of 20S pre-rRNA | snoRNA binding |
| *YGR151C* | *YGR151C* | 2x | - | - | - |
| *YHL020C* | *OPI1* | 2x | nucleus | positive regulation of transcription from Pol II promoter | transcription corepressor activity |
| *YHL024W* | *RIM4* | 2x | cytoplasm | meiosis | RNA binding |
| *YHR064C* | *SSZ1* | 2x | cytoplasm | protein biosynthesis | unfolded protein binding |
| *YHR072W* | *ERG7* | 2x | plasma membrane | ergosterol biosynthesis | lanosterol synthase activity |
| *YHR149C* | *YHR149C* | 2x | bud neck | bp unknown | mf unknown |
| *YHR158C* | *KEL1* | 2x | cytoplasm | cellular morphogenesis | mf unknown |
| *YHR159W* | *YHR159W* | 2x | cytoplasm | bp unknown | mf unknown |
| *YIL165C* | *YIL165C* | 2x | cc unknown | bp unknown | mf unknown |
| *YJL083W* | *YJL083W* | 2x | cc unknown | bp unknown | mf unknown |
| *YJL096W* | *MRPL49* | 2x | mitochondrial large ribosomal subunit | protein biosynthesis | structural constituent of ribosome |
| *YJL112W* | *MDV1* | 2x | mitochondrial outer membrane | mitochondrial genome maintenance | mf unknown |
| *YJL115W* | *ASF1* | 2x | chromatin assembly complex | DNA damage response, signal transduction resulting in induction of apoptosis | histone binding |
| *YJL173C* | *RFA3* | 2x | chromosome, telomeric region | DNA recombination | DNA binding |
| *YJL201W* | *ECM25* | 2x | cytoplasm | cell wall organization and biogenesis | mf unknown |
| *YJR022W* | *LSM8* | 2x | nucleus | nuclear mRNA splicing, via spliceosome | pre-mRNA splicing factor activity |
| *YJR130C* | *STR2* | 2x | cytoplasm | sulfur metabolism | cystathionine gamma-synthase activity |
| *YJR141W* | *YJR141W* | 2x | cc unknown | mRNA processing | mf unknown |
| *YJR155W* | *AAD10* | 2x | cc unknown | aldehyde metabolism | aryl-alcohol dehydrogenase activity |
| *YKL001C* | *MET14* | 2x | cell | methionine metabolism | adenylyl-sulfate kinase activity |
| *YKL057C* | *NUP120* | 2x | nuclear pore | mRNA-nucleus export | structural molecule activity |
| *YKL086W* | *SRX1* | 2x | cytoplasm | response to oxidative stress | oxidoreductase activity, acting on sulfur group of donors |
| *YKL089W* | *MIF2* | 2x | nucleus | mitotic spindle assembly (sensu Fungi) | centromeric DNA binding |
| *YKL092C* | *BUD2* | 2x | intracellular | bud site selection | signal transducer activity |
| *YKL124W* | *SSH4* | 2x | cc unknown | bp unknown | mf unknown |
| *YKL155C* | *RSM22* | 2x | mitochondrial small ribosomal subunit | protein biosynthesis | structural constituent of ribosome |
| *YKR020W* | *VPS51* | 2x | Golgi apparatus | protein-vacuolar targeting | protein binding |
| *YKR039W* | *GAP1* | 2x | integral to plasma membrane | amino acid transport | general amino acid permease activity |
| *YKR064W* | *YKR064W* | 2x | cytoplasm | bp unknown | mf unknown |
| *YKR078W* | *YKR078W* | 2x | cytoplasm | protein transport | protein transporter activity |
| *YKR101W* | *SIR1* | 2x | chromatin silencing complex | chromatin silencing at silent mating-type cassette (sensu Fungi) | DNA binding |
| *YLR027C* | *AAT2* | 2x | cytoplasm | nitrogen metabolism | aspartate transaminase activity |
| *YLR035C* | *MLH2* | 2x | nucleus | DNA repair | mf unknown |
| *YLR056W* | *ERG3* | 2x | endoplasmic reticulum | ergosterol biosynthesis | C-5 sterol desaturase activity |
| *YLR105C* | *SEN2* | 2x | mitochondrial outer membrane | tRNA splicing | tRNA-intron endonuclease activity |
| *YLR222C* | *UTP13* | 2x | small nucleolar ribonucleoprotein complex | processing of 20S pre-rRNA | snoRNA binding |
| *YLR262C* | *YPT6* | 2x | Golgi apparatus | intracellular protein transport | GTPase activity |
| *YLR338W* | *YLR338W* | 2x | - | - | - |
| *YLR359W* | *ADE13* | 2x | cc unknown | purine nucleotide biosynthesis | adenylosuccinate lyase activity |
| *YLR376C* | *PSY3* | 2x | cytoplasm | bp unknown | mf unknown |
| *YLR424W* | *YLR424W* | 2x | cytoplasm | nuclear mRNA splicing, via spliceosome | RNA binding |
| *YLR435W* | *TSR2* | 2x | cytoplasm | processing of 20S pre-rRNA | mf unknown |
| *YLR436C* | *ECM30* | 2x | cytoplasm | cell wall organization and biogenesis | mf unknown |
| *YLR466W* | *YRF1-4* | 2x | nucleus | telomerase-independent telomere maintenance | DNA helicase activity |
| *YML005W* | *YML005W* | 2x | cytoplasm | bp unknown | S-adenosylmethionine-dependent methyltransferase activity |
| *YML006C* | *GIS4* | 2x | cytoplasm | intracellular signaling cascade | mf unknown |
| *YML106W* | *URA5* | 2x | cytoplasm | pyrimidine base biosynthesis | orotate phosphoribosyltransferase activity |
| *YML121W* | *GTR1* | 2x | cytoplasm | phosphate transport | GTPase activity |
| *YMR001C* | *CDC5* | 2x | nucleus | protein amino acid phosphorylation | protein serine/threonine kinase activity |
| *YMR003W* | *YMR003W* | 2x | mitochondrion | bp unknown | mf unknown |
| *YMR074C* | *YMR074C* | 2x | cytoplasm | bp unknown | mf unknown |
| *YMR087W* | *YMR087W* | 2x | cc unknown | bp unknown | mf unknown |
| *YMR120C* | *ADE17* | 2x | cytosol | purine nucleotide biosynthesis | IMP cyclohydrolase activity |
| *YMR168C* | *CEP3* | 2x | condensed nuclear chromosome kinetochore | mitotic spindle checkpoint | DNA bending activity |
| *YMR190C* | *SGS1* | 2x | nucleolus | mitotic sister chromatid segregation | ATP-dependent DNA helicase activity |
| *YMR192W* | *APP2* | 2x | cytoplasm | actin filament organization | mf unknown |
| *YMR218C* | *TRS130* | 2x | TRAPP | ER to Golgi transport | mf unknown |
| *YMR252C* | *YMR252C* | 2x | mitochondrion | bp unknown | mf unknown |
| *YMR253C* | *YMR253C* | 2x | cytoplasm | bp unknown | mf unknown |
| *YMR256C* | *COX7* | 2x | respiratory chain complex IV (sensu Eukarya) | aerobic respiration | cytochrome-c oxidase activity |
| *YMR287C* | *MSU1* | 2x | mitochondrion | RNA catabolism | exoribonuclease II activity |
| *YMR300C* | *ADE4* | 2x | cytoplasm | purine nucleotide biosynthesis | amidophosphoribosyltransferase activity |
| *YNL047C* | *SLM2* | 2x | cc unknown | bp unknown | mf unknown |
| *YNL068C* | *FKH2* | 2x | nucleus | pseudohyphal growth | transcription factor activity |
| *YNL082W* | *PMS1* | 2x | nuclear chromosome | meiosis | DNA binding |
| *YNL119W* | *NCS2* | 2x | cytoplasm | pseudohyphal growth | mf unknown |
| *YNL133C* | *FYV6* | 2x | nucleus | double-strand break repair via nonhomologous end-joining | mf unknown |
| *YNL182C* | *IPI3* | 2x | nucleus | 35S primary transcript processing | mf unknown |
| *YNL220W* | *ADE12* | 2x | cytoplasm | purine nucleotide biosynthesis | adenylosuccinate synthase activity |
| *YNL225C* | *CNM67* | 2x | spindle pole body | microtubule nucleation | structural constituent of cytoskeleton |
| *YNL259C* | *ATX1* | 2x | cytosol | response to oxidative stress | copper chaperone activity |
| *YNL273W* | *TOF1* | 2x | nuclear chromosome | DNA replication checkpoint | mf unknown |
| *YNL303W* | *YNL303W* | 2x | - | - | - |
| *YNL309W* | *STB1* | 2x | cytoplasm | G1/S transition of mitotic cell cycle | transcriptional activator activity |
| *YNL310C* | *YNL310C* | 2x | mitochondrion | bp unknown | mf unknown |
| *YNL316C* | *PHA2* | 2x | cytoplasm | phenylalanine biosynthesis, prephenate pathway | prephenate dehydratase activity |
| *YNL323W* | *LEM3* | 2x | cytoplasm | cell surface receptor linked signal transduction | transcription regulator activity |
| *YNR041C* | *COQ2* | 2x | mitochondrial inner membrane | ubiquinone metabolism | prenyltransferase activity |
| *YOL001W* | *PHO80* | 2x | cyclin-dependent protein kinase holoenzyme complex | regulation of phosphate metabolism | cyclin-dependent protein kinase regulator activity |
| *YOL017W* | *ESC8* | 2x | nucleus | chromatin silencing | mf unknown |
| *YOL090W* | *MSH2* | 2x | nuclear chromosome | DNA recombination | ATPase activity |
| *YOL091W* | *SPO21* | 2x | spindle pole body | meiosis | structural molecule activity |
| *YOL096C* | *COQ3* | 2x | mitochondrion | ubiquinone metabolism | hexaprenyldihydroxybenzoate methyltransferase activity |
| *YOL113W* | *SKM1* | 2x | cc unknown | protein amino acid phosphorylation | protein serine/threonine kinase activity |
| *YOL157C* | *YOL157C* | 2x | cc unknown | bp unknown | mf unknown |
| *YOR023C* | *AHC1* | 2x | Ada2/Gcn5/Ada3 transcription activator complex | nucleosome disassembly | mf unknown |
| *YOR184W* | *SER1* | 2x | cytoplasm | purine base biosynthesis | phosphoserine transaminase activity |
| *YOR195W* | *SLK19* | 2x | condensed nuclear chromosome kinetochore | meiosis | mf unknown |
| *YOR329C* | *SCD5* | 2x | actin cortical patch (sensu Fungi) | actin filament organization | protein binding |
| *YOR349W* | *CIN1* | 2x | cc unknown | post-chaperonin tubulin folding pathway | beta-tubulin binding |
| *YOR375C* | *GDH1* | 2x | cytoplasm | glutamate biosynthesis | glutamate dehydrogenase (NADP+) activity |
| *YPL013C* | *MRPS16* | 2x | mitochondrial small ribosomal subunit | protein biosynthesis | structural constituent of ribosome |
| *YPL016W* | *SWI1* | 2x | nucleosome remodeling complex | chromatin remodeling | general RNA polymerase II transcription factor activity |
| *YPL053C* | *KTR6* | 2x | membrane fraction | cell wall organization and biogenesis | mannosylphosphate transferase activity |
| *YPL078C* | *ATP4* | 2x | proton-transporting ATP synthase, stator stalk (sensu Eukarya) | ATP synthesis coupled proton transport | structural molecule activity |
| *YPL092W* | *SSU1* | 2x | plasma membrane | sulfite transport | sulfite transporter activity |
| *YPL124W* | *SPC29* | 2x | central plaque of spindle pole body | microtubule nucleation | structural constituent of cytoskeleton |
| *YPL163C* | *SVS1* | 2x | cell wall (sensu Fungi) | response to chemical substance | mf unknown |
| *YPL208W* | *YPL208W* | 2x | cytoplasm | bp unknown | mf unknown |
| *YPL233W* | *NSL1* | 2x | kinetochore | chromosome segregation | mf unknown |
| *YPR018W* | *RLF2* | 2x | nucleus | nucleosome assembly | mf unknown |
| *YPR031W* | *YPR031W* | 2x | cytoplasm | bp unknown | mf unknown |
| *YPR049C* | *ATG11* | 2x | extrinsic to membrane | protein-vacuolar targeting | mf unknown |
| *YPR092W* | *YPR092W* | 2x | - | - | - |
| *YPR106W* | *ISR1* | 2x | cc unknown | bp unknown | protein kinase activity |
| *YPR111W* | *DBF20* | 2x | cytoplasm | protein amino acid phosphorylation | protein serine/threonine kinase activity |
| *YPR174C* | *YPR174C* | 2x | cc unknown | bp unknown | mf unknown |
| *YCR026C* | *YCR026C* | 4x | cc unknown | bp unknown | mf unknown |
| *YDR395W* | *SXM1* | 4x | nucleus | mRNA-nucleus export | protein carrier activity |
| *YEL065W* | *SIT1* | 4x | endosome | iron ion homeostasis | siderochrome-iron (ferrioxamine) uptake transporter activity |
| *YGL051W* | *MST27* | 4x | endoplasmic reticulum | vesicle organization and biogenesis | protein binding |
| *YGL117W* | *YGL117W* | 4x | cc unknown | bp unknown | mf unknown |
| *YJR059W* | *PTK2* | 4x | cytoplasm | G1/S transition of mitotic cell cycle | protein kinase activity |
| *YKR058W* | *GLG1* | 4x | cc unknown | glycogen biosynthesis | glycogenin glucosyltransferase activity |
| *YKR080W* | *MTD1* | 4x | cytosol | one-carbon compound metabolism | methylenetetrahydrofolate dehydrogenase (NAD+) activity |
| *YLR058C* | *SHM2* | 4x | cytoplasm | one-carbon compound metabolism | glycine hydroxymethyltransferase activity |
| *YLR467W* | *YRF1-5* | 4x | nucleus | telomerase-independent telomere maintenance | DNA helicase activity |
| *YNL304W* | *YPT11* | 4x | bud neck | mitochondrion inheritance | GTPase activity |
| *YOR292C* | *YOR292C* | 4x | vacuole (sensu Fungi) | bp unknown | mf unknown |
| *YPL267W* | *YPL267W* | 4x | cc unknown | bp unknown | mf unknown |
| *YDR153C* | *ENT5* | 6x | cytoplasm | Golgi to endosome transport | clathrin binding |
| *YER098W* | *UBP9* | 6x | cytoplasm | protein deubiquitination | ubiquitin-specific protease activity |
| *YJR147W* | *HMS2* | 6x | cytoplasm | pseudohyphal growth | mf unknown |
| *YKL174C* | *YKL174C* | 6x | cc unknown | bp unknown | mf unknown |

**Table S3a. Functions over-represented in the down-regulated microarray data of the *swi6* deletant after LoaOOH treatment.**

| **Category** | **p-value** | **In Category from Cluster** | **k** | **f** |
| --- | --- | --- | --- | --- |
| **MIPS Functional Classification (259 categories)** |  |  |  |  |
| fermentation* | 3.07E-04 | *YAL061W YHL008C* ***PDC5*** *ASC1* ***ALD3*** *ADH6 ALD6* | 7 | 33 |
| metabolism of energy reserves (glycogen, trehalose) | 6.43E-04 | *TPS1 UGP1 GSY2 PGM2 PHO85* ***HSP82*** *GPH1* | 7 | 37 |
| utilization of vitamins, cofactors, and prosthetic groups | 2.11E-03 | *CYC3 PHO3 YKL132C* | 3 | 7 |
| metabolism of vitamins, cofactors, and prosthetic groups | 2.56E-03 | *CYC3 PHO3 FAD1 COQ4 YGL157W YKL132C MET1 PCD1 FMS1 RIB4* | 10 | 86 |
| pentose-phosphate pathway | 4.76E-03 | *YGR043C GND1 TKL1* | 3 | 9 |
|  |  |  |  |  |
| **MIPS Protein Complexes (315 categories)** |  |  |  |  |
| cytoplasmic ribosomal large subunit | 4.21E-04 | ***RPL4A*** *RPL4B RPL2B RPP0 RPL18B RPP2A RPL18A RPL3 RPL5 RPL7B RPL1A* | 11 | 81 |
|  |  |  |  |  |
| **MIPS Protein Classes (190 categories)** |  |  |  |  |
| Molecular chaperones* | 1.59E-06 | ***SSA1*** *SSA3 SSE2 HSP78* ***SSA4*** *ZUO1* ***SSA2*** *HSP104 HSC82 SIS1 YDJ1* ***HSP82*** | 12 | 55 |
| HSP70 family* | 2.39E-04 | ***SSA1*** *SSA3 SSE2* ***SSA4******SSA2*** | 5 | 15 |
| aldehyde dehydrogenases | 4.76E-03 | ***ALD3*** *ALD4 ALD6* | 3 | 9 |
| HSP100/Clp family | 4.89E-03 | *HSP78 HSP104* | 2 | 3 |
|  |  |  |  |  |
| **GO Molecular Function (1377 categories)** |  |  |  |  |
| ATP-binding cassette (ABC) transporter* [GO:0004009] | 4.58E-05 | *SNQ2 PDR15 KRE30* ***YOR1*** *HSC82 PDR5* ***HSP82*** | 7 | 25 |
| hydrolase, acting on acid anhydrides, catalyzing transmembrane movement of substances* [GO:0016820] | 7.61E-04 | *SNQ2 PDR15 KRE30 PMA1* ***YOR1*** *HSC82 PDR5 PMA2* ***HSP82*** | 9 | 61 |
| NADPH dehydrogenase [GO:0003959] | 1.68E-03 | *OYE2 OYE3* | 2 | 2 |
| plasma membrane cation-transporting ATPase* [GO:0004005] | 1.68E-03 | *HSC82* ***HSP82*** | 2 | 2 |
| multidrug transporter [GO:0015239] | 3.27E-03 | *SNQ2* ***YOR1*** *PDR5* | 3 | 8 |
| glucose transporter [GO:0005355] | 4.31E-03 | *HXT7 HXT6 HXT1 HXT2* | 4 | 17 |
| glyceraldehyde 3-phosphate dehydrogenase (phosphorylating) [GO:0004365] | 4.89E-03 | *TDH3 TDH2* | 2 | 3 |
|  |  |  |  |  |
| **GO Biological Process (1380 categories)** |  |  |  |  |
| protein folding* [GO:0006457] | 3.81E-11 | ***SSA1*** *SSA3 HSP26 SSE2 HSP30 HSP78* ***SSA4*** *ZUO1* ***SSA2*** *HSP104 CPR6 CPR3 HSC82 STI1* ***HSP82*** | 15 | 42 |
| alcohol metabolism [GO:0006066] | 6.93E-08 | *CDC19 PGK1 HXK1 TDH3 ENO1 GRE3 ENO2 GND1 RHR2 TDH2 YJR096W UGP1* ***PDC5*** *PGM2 ADH6 ALD4 TKL1* | 17 | 88 |
| monosaccharide metabolism [GO:0005996] | 3.39E-06 | *CDC19 PGK1 HXK1 TDH3 ENO1 GRE3 ENO2 GND1 TDH2 YJR096W UGP1 PGM2 TKL1* | 13 | 69 |
| response to stress* [GO:0006950] | 5.57E-06 | *SSA3 HSP26 UBC4 TPS1* ***HSP30*** *RAD59 SNQ2 HSP42 HSP78* ***SSA4******CTT1*** *PUP2 CUP1-1 GRE3 RHR2 MSN4 HSP104 AHP1* ***ALD3*** *SIP18 HSC82* ***YGP1******HSP82*** | 23 | 199 |
| glycolysis [GO:0006096] | 2.54E-05 | *CDC19 PGK1 TDH3 ENO1 ENO2 TDH2* | 6 | 16 |
| alcohol biosynthesis [GO:0046165] | 4.11E-04 | *PGK1 TDH3 ENO1 ENO2 RHR2 TDH2* | 6 | 25 |
| SRP-dependent, co-translational membrane targeting, translocation* [GO:0006616] | 1.05E-03 | ***SSA1*** *SSA3* ***SSA4******SSA2*** | 4 | 12 |
| main pathways of carbohydrate metabolism [GO:0006092] | 1.28E-03 | *CDC19 PGK1 TDH3 ENO1 ENO2 TDH2 LSC1 TKL1* | 8 | 53 |
| gluconeogenesis [GO:0006094] | 1.32E-03 | *PGK1 TDH3 ENO1 ENO2 TDH2* | 5 | 21 |
| arabinose metabolism [GO:0019566] | 4.89E-03 | *GRE3 YJR096W* | 2 | 3 |
| positive regulation of glycolysis [GO:0045821] | 4.89E-03 | *GCR2 TYE7* | 2 | 3 |
|  |  |  |  |  |
| **GO Cellular Component (330 categories)** |  |  |  |  |
| cytosolic large ribosomal subunit (sensu Eukarya) [GO:0005842] | 5.22E-04 | ***RPL4A*** *RPL4B RPL2B RPP0 RPL18B RPP2A RPL18A RPL3 RPL5 RPL7B RPL1A* | 11 | 83 |
| phosphopyruvate hydratase complex [GO:0000015] | 1.68E-03 | *ENO1 ENO2* | 2 | 2 |
|  |  |  |  |  |

*NOTE: Genes whose expression differed by greater than 4 fold are highlighted as bold underlined text. Categories that are underlined and marked with an asterix are also over-represented using solely the 4 fold change in expression data.*

**Table S3b. Functions over-represented in the microarray data for genes up-regulated in the *swi6* deletant after LoaOOH treatment.**

| **MIPS Functional Classification (259 categories)** |  |  |  |  |
| --- | --- | --- | --- | --- |
| purine ribonucleotide metabolism* | 8.01E-04 | *HPT1* ***MTD1******SHM2*** *ADE13 ADE17 ADE4 ADE12* | 7 | 45 |
|  |  |  |  |  |
| **MIPS Phenotypes (180 categories)** |  |  |  |  |
| other DNA repair mutants | 4.46E-03 | *DUN1 CDC2 MSH6 RFA3 MSH2* | 5 | 32 |
|  |  |  |  |  |
| **MIPS Protein Complexes (315 categories)** |  |  |  |  |
| DNA mismatch repair complexes | 3.89E-04 | *MSH6 PMS1 MSH2* | 3 | 5 |
| MSH2/MSH6 complex | 1.19E-03 | *MSH6 MSH2* | 2 | 2 |
| MSH2/MSH3 complex | 3.50E-03 | *PMS1 MSH2* | 2 | 3 |
|  |  |  |  |  |
| **GO Molecular Function (1377 categories)** |  |  |  |  |
| transferase, transferring pentosyl groups [GO:0016763] | 1.07E-03 | *HPT1 HIS1 URA5 ADE4* | 4 | 14 |
| phosphotransferase, alcohol group as acceptor [GO:0016773] | 3.33E-03 | *DUN1 CLB3 DBF4 IPK1 PKH1 GIN4 ADK2* ***PTK2*** *MET14 CDC5 PHO80 SKM1 ISR1 DBF20* | 14 | 178 |
|  |  |  |  |  |
| **GO Biological Process (1380 categories)** |  |  |  |  |
| S phase of mitotic cell cycle [GO:0000084] | 7.67E-05 | *MBP1 CDC2 DBF4 MSH6 MCM6 RIM4 RFA3 CDC5 SGS1 PMS1 TOF1 MSH2* | 12 | 93 |
| mitotic cell cycle [GO:0000278] | 1.17E-04 | *KAR4 MBP1 CDC2 CLB3 DBF4 MSH6 SPC19 CIN8 SMC1 MCM6 RIM4 RFA3 MIF2 CDC5 CEP3 SGS1 FKH2 PMS1 TOF1 STB1 MSH2 SLK19* | 22 | 266 |
| purine base metabolism [GO:0006144] | 7.81E-04 | ***MTD1*** *ADE13 ADE4 SER1* | 4 | 13 |
| cell cycle [GO:0007049] | 4.28E-03 | *KAR4 MBP1 DUN1 CDC2 CLB3 DBF4 MSH6 SPC19 CHL4 GIN4 CIN8 SMC1 MCM6 RIM4 RFA3 MIF2 CDC5 CEP3 SGS1 FKH2 PMS1 TOF1 STB1 MSH2 SKM1 SLK19 SPC29 NSL1 DBF20* | 29 | 504 |
| mismatch repair [GO:0006298] | 4.38E-03 | *CDC2 MSH6 PMS1 MSH2* | 4 | 20 |
|  |  |  |  |  |
| **GO Cellular Component (330 categories)** |  |  |  |  |
| spindle [GO:0005819] | 4.82E-03 | *SPC19 CIN8 CDC5 CNM67 SPO21 SPC29 NSL1* | 7 | 61 |

*NOTE: Genes whose expression differed by greater than 4 fold are highlighted as bold underlined text. Categories that are underlined and marked with an asterix are also over-represented using solely the 4 fold change in expression data.*
